# Supplementary material
Source: MDPI journal article supplement (https://www.mdpi.com/2227-9040/10/5/177)
Supplement: s1 [file s1 › chemosensors-1695346-supplementary.pdf]

# A microphysiometric system based on LAPS for real-time monitoring of microbial metabolism

Nan Jiang <sup>1,2,3</sup>, Tao Liang <sup>4</sup>, Chunlian Qin <sup>1</sup>, Qunchen Yuan <sup>1</sup>, Mengxue Liu <sup>1</sup>, Liuqing Zhuang <sup>1,2,3</sup> and Ping Wang <sup>1,2,3\*</sup>

<sup>1</sup> Biosensor National Special Laboratory, Key Laboratory for Biomedical Engineering of Education Ministry, Department of Biomedical Engineering, Zhejiang University, Hangzhou 310027, China; 21915031@zju.edu.cn (N.J.); lotusqin@zju.edu.cn (C.Q.); sumyuan@zju.edu.cn (Q.Y.); liumx15015@zju.edu.cn (M.L.); liujing123@zju.edu.cn (L.Z.)

<sup>2</sup> The MOE Frontier Science Center for Brain Science & Brain-machine Integration, Zhejiang University, Hangzhou 310058, China

<sup>3</sup> State Key Laboratory of Transducer Technology, Chinese Academy of Sciences, Shanghai, 200050, China

<sup>4</sup> Research Center for Quantum Sensing, Zhejiang Lab, Hangzhou 310000, China; cooltao@zju.edu.cn

\* Correspondence: cnpwang@zju.edu.cn

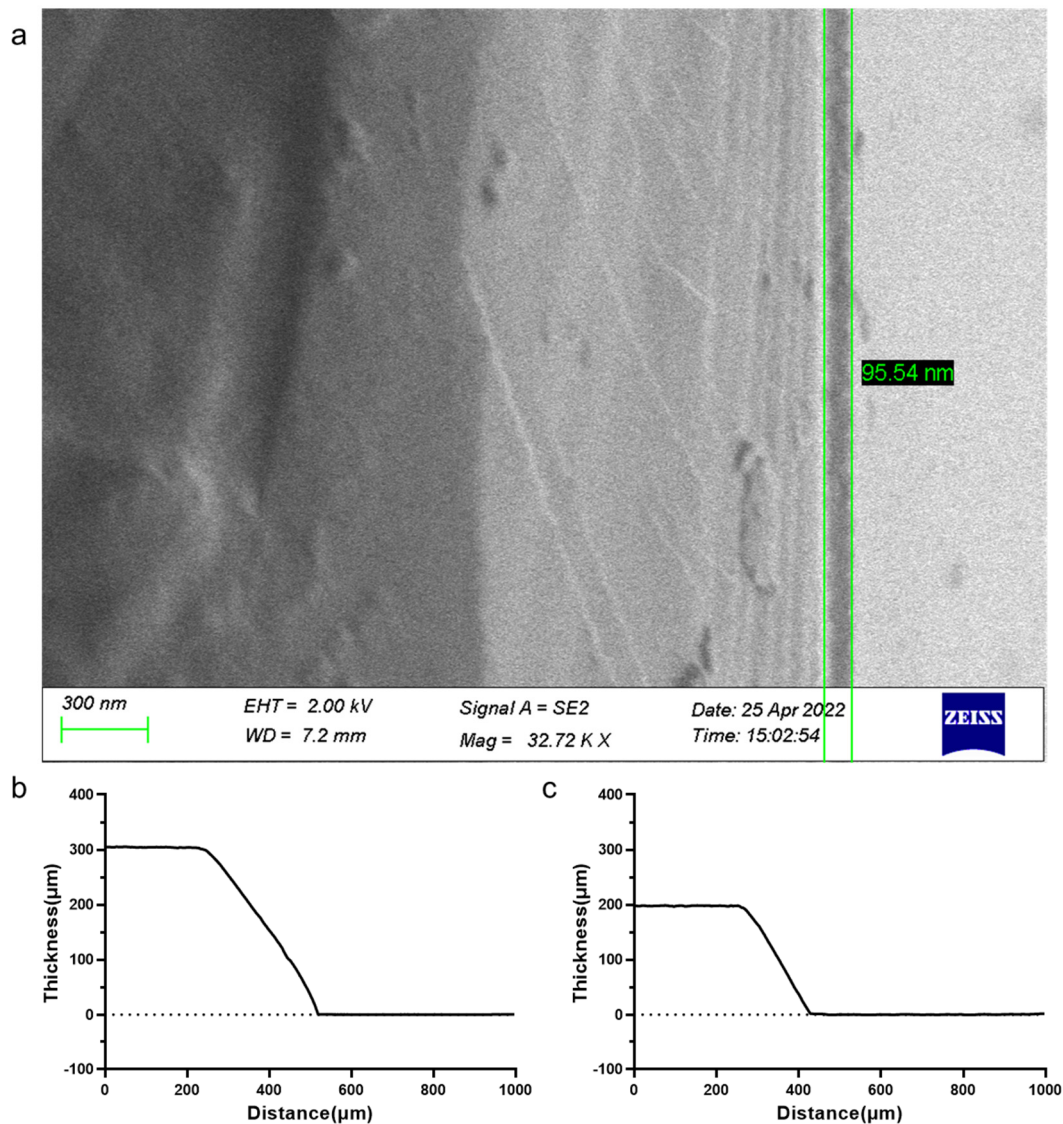

**Figure S1. Verification of the thickness of the thinned LAPS chip.** (a) SEM image of the  $\text{Si}_3\text{N}_4$  and  $\text{SiO}_2$  layer, the total thickness is  $\sim 100$  nm. (b-c) The thickness of the thinned central part measured by surface profiler. (b) shows that the total thickness of the LAPS chip is  $\sim 300$   $\mu\text{m}$  while (c) shows that the depth of the central part is  $\sim 200$   $\mu\text{m}$ , so the thickness of the thinned central part of the Si substrate is  $\sim 100$   $\mu\text{m}$ .

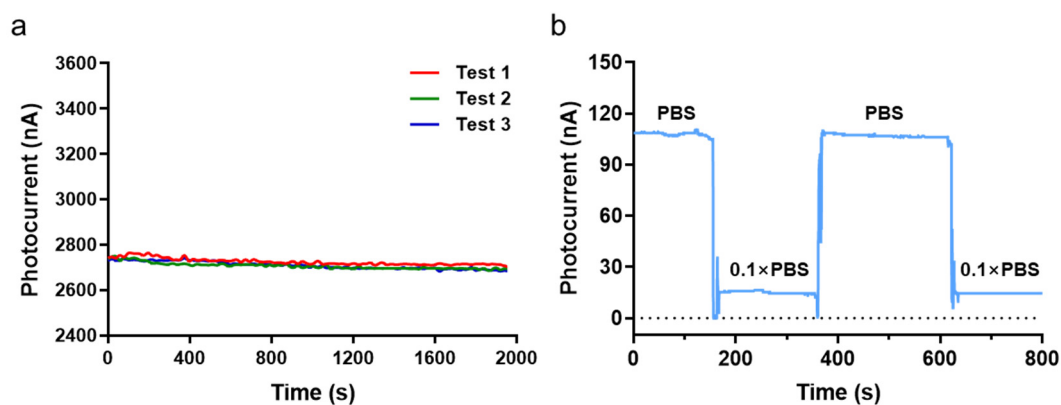

**Figure S2. Verification of stability, repeatability and fluid exchange capability of the system.** (a) Sensor stability and repeatability in constant voltage mode. (b) PBS and 10-fold diluted PBS were injected into the sensor chamber alternately. The photocurrent value was varied with change of the impedance of solution.

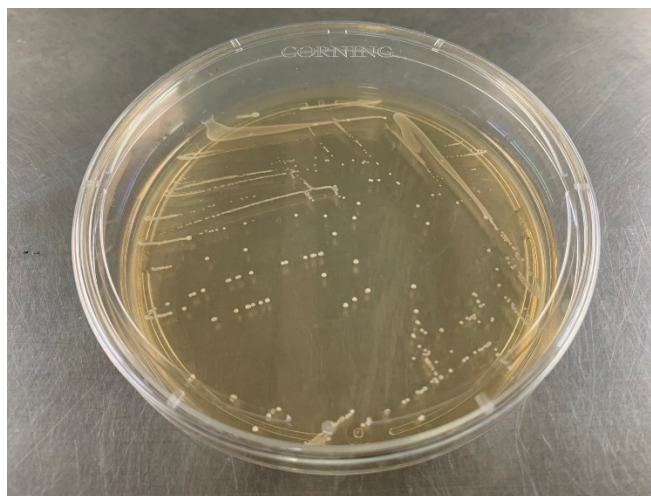

**Figure S3. Verification of the activity of *Lactobacillus rhamnosus* after experiment.** The growth state of *Lact. rhamnosus* on MRS agar plate after experiment.
